# Supplementary material for: Exploration of fathers’ mental health and well-being concerns during the transition to fatherhood, and paternal perinatal support: scoping review
Source: PubMed Central journal article supplement (PMC11574476; doi:10.1136/bmjopen-2023-078386), 2024-11-12
Supplement: bmjopen-14-11-s003.pdf [file bmjopen-14-11-s003.pdf]

Additional File 3. Table showing which studies are related to each theme and sub-theme.

| First Author (Year)         | Theme 1 | Theme | Theme 2 | Theme 2 | Theme 3 | Theme 3 | Theme 4 | Theme 4 |
|-----------------------------|---------|-------|---------|---------|---------|---------|---------|---------|
|                             | 1       | 2     | 1       | 2       | 1       | 2       | 1       | 2       |
| Baldwin (2019) [4]          | ✓       |       | ✓       | ✓       | ✓       | ✓       | ✓       | ✓       |
| Baldwin et al. (2021) [28]  |         |       | ✓       |         | ✓       | ✓       | ✓       | ✓       |
| Baral (2021) [29]           | ✓       |       | ✓       | ✓       |         |         | ✓       |         |
| Barclay (1996) [30]         | ✓       |       | ✓       |         | ✓       | ✓       | ✓       |         |
| Clifford-Motop (2022) [58]  | ✓       | ✓     | ✓       | ✓       | ✓       | ✓       | ✓       | ✓       |
| Dallos (2011) [31]          | ✓       | ✓     | ✓       | ✓       |         |         | ✓       |         |
| Darwin (2017) [10]          | ✓       | ✓     | ✓       | ✓       | ✓       | ✓       | ✓       | ✓       |
| Davenport (2023) [59]       | ✓       |       | ✓       | ✓       |         |         | ✓       |         |
| Deave (2008) [32]           | ✓       |       | ✓       | ✓       | ✓       | ✓       | ✓       | ✓       |
| Edhborg (2016) [19]         | ✓       | ✓     | ✓       | ✓       |         | ✓       |         |         |
| Fagerskiold (2008) [33]     | ✓       | ✓     | ✓       |         |         | ✓       |         | ✓       |
| Fei-Wan a (2019) [34]       | ✓       |       | ✓       | ✓       | ✓       |         |         | ✓       |
| Fenwick (2012) [35]         |         | ✓     | ✓       |         | ✓       | ✓       | ✓       |         |
| Finnbogadottir (2002) [36]  | ✓       | ✓     | ✓       |         | ✓       | ✓       | ✓       | ✓       |
| Fletcher, (2019) [37]       | ✓       | ✓     | ✓       |         |         |         |         | ✓       |
| Gottfredsdottir (2005) [38] | ✓       | ✓     | ✓       | ✓       | ✓       | ✓       |         |         |
| Hall (1994) [39]            | ✓       | ✓     | ✓       | ✓       |         |         |         | ✓       |
| Hodgson (2021) [40]         |         | ✓     |         |         | ✓       | ✓       | ✓       | ✓       |
| Johannsson (2016) [41]      |         | ✓     | ✓       |         |         |         |         | ✓       |
| Johansson (2020) [42]       | ✓       |       | ✓       |         | ✓       |         | ✓       |         |
| Kaner (2023) [60]           | ✓       |       |         |         |         | ✓       | ✓       | ✓       |
| Kowlessar (2014) [43]       |         | ✓     |         |         |         | ✓       |         |         |
| Lagarto (2021) [44]         |         | ✓     |         | ✓       | ✓       |         | ✓       | ✓       |
| Ling (2021) [45]            | ✓       |       | ✓       | ✓       | ✓       |         | ✓       | ✓       |
| Machin (2015) [46]          |         | ✓     | ✓       |         | ✓       |         | ✓       | ✓       |
| Nesporova (2019) [47]       |         |       | ✓       |         |         |         | ✓       |         |
| Pallson (2017) [48]         | ✓       | ✓     | ✓       |         |         | ✓       | ✓       |         |
| Pedersen (2021) [49]        |         | ✓     | ✓       | ✓       | ✓       | ✓       | ✓       |         |
| Rayburn (2021) [50]         |         |       |         |         |         | ✓       | ✓       | ✓       |
| Reay (2023) [61]            | ✓       |       |         |         | ✓       |         | ✓       | ✓       |
| Rominov (2018) [51]         |         | ✓     |         | ✓       | ✓       | ✓       | ✓       | ✓       |
| Shorey (2017) [52]          | ✓       |       | ✓       | ✓       | ✓       | ✓       | ✓       | ✓       |
| Shorey (2018) [53]          |         | ✓     | ✓       | ✓       |         | ✓       |         |         |
| Shorey (2019) [54]          | ✓       | ✓     | ✓       | ✓       |         | ✓       |         |         |
| St. John (2005) [55]        | ✓       | ✓     | ✓       | ✓       |         |         | ✓       | ✓       |
| Tehrani (2015) [56]         |         |       | ✓       |         |         |         |         |         |
| Wilkes (2010) [57]          | ✓       |       | ✓       | ✓       |         | ✓       | ✓       |         |

Around 2/3 of studies related to each sub-theme
